# Supplementary material
Source: PubMed Central journal article supplement (PMC7537763)
Supplement: NIHMS1592090-supplement-1.pdf [file NIHMS1592090-supplement-1.pdf]

**Figure S1***Latent Profile Groups across Three Time Points*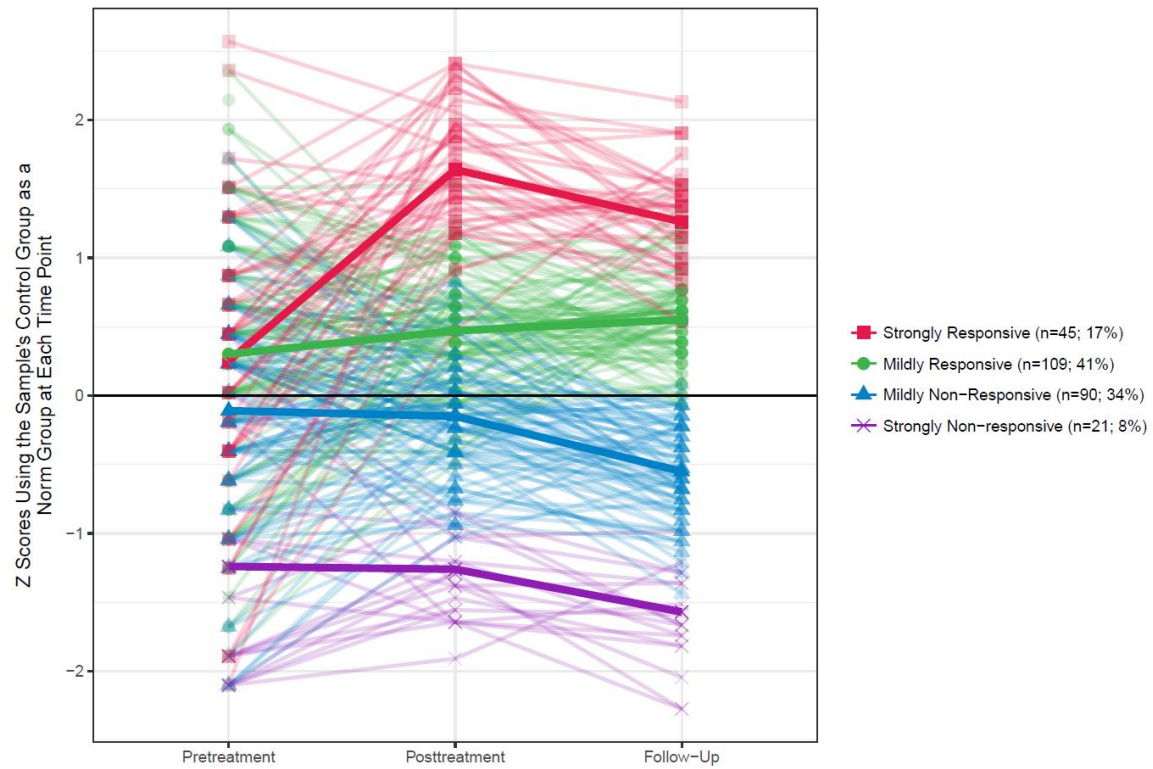

*Note.* The bolded color line represents the mean developmental trajectory of each profile group. The thin color line represents individual developmental trajectory within each profile group.
